# Supplementary material
Source: publisher figshare collection journal article supplement (https://asha.figshare.com/articles/dataset/_/25014017)
Supplement: Supplementary file 1 [file 1]

**Supplemental Material S2.** Thematic organization of guidelines reviewed for inclusion in the Reader Referral List, with citations.

| <b>Thematic Categories<br/>(N = 13)</b>      | <b>Descriptive Features<br/>(N = 42)</b>     | <b>Author (Year)</b>                                                                                                                                                                                                                                                                                                                                                                                                                                                                                                                    |
|----------------------------------------------|----------------------------------------------|-----------------------------------------------------------------------------------------------------------------------------------------------------------------------------------------------------------------------------------------------------------------------------------------------------------------------------------------------------------------------------------------------------------------------------------------------------------------------------------------------------------------------------------------|
| Study Design ( <i>n</i> = 6)                 | Case report ( <i>n</i> = 2)                  | Gagnier et al., 2013; Sorinola et al., 2004;                                                                                                                                                                                                                                                                                                                                                                                                                                                                                            |
|                                              | Case series ( <i>n</i> = 1)                  | Agha et al., 2020;                                                                                                                                                                                                                                                                                                                                                                                                                                                                                                                      |
|                                              | Cohort study ( <i>n</i> = 1)                 | Reeves & Gaus, 2004;                                                                                                                                                                                                                                                                                                                                                                                                                                                                                                                    |
|                                              | Survey study ( <i>n</i> = 4)                 | Burns et al., 2008; Eysenbach, 2004; Kelley et al., 2003; Sharma et al., 2021;                                                                                                                                                                                                                                                                                                                                                                                                                                                          |
|                                              | Observational study ( <i>n</i> = 3)          | Lee et al., 2021; Portell et al., 2015; von Elm et al., 2007;                                                                                                                                                                                                                                                                                                                                                                                                                                                                           |
|                                              | Randomized controlled trial ( <i>n</i> = 24) | Boutron et al., 2017; Calvert et al., 2013; Campbell et al., 2012; Dwan et al., 2019; Dimairo et al., 2020; Eldridge et al., 2016; Eysenbach & Group, 2011; Hemming et al., 2018; Hopewell et al., 2008; Howick et al., 2020; Junqueira et al., 2023; Juszczak et al., 2019; Kent et al., 2010; Kwakkenbos et al., 2021; Liu et al., 2020; Orkin et al., 2021; Pandis et al., 2017; Piaggio et al., 2012; Ramsey et al., 2005; Rivera et al., 2020; Schulz et al., 2010; Rhon et al., 2022; Ros et al., 2020; Zwarenstein et al., 2008; |
| Approaches to Synthesis ( <i>n</i> = 4)      | Meta-analysis ( <i>n</i> = 4)                | Cohen et al., 2021; Bossuyt et al., 2015; Riley et al., 2010; Sanchez-Meca et al., 2021;                                                                                                                                                                                                                                                                                                                                                                                                                                                |
|                                              | Systematic reviews ( <i>n</i> = 8)           | Albrecht et al., 2013; Centre for Reviews and Dissemination, 2009; Cohen et al., 2021; Higgins et al., 2020; Hutton et al., 2015; Bossuyt et al., 2015; Higgins et al., 2020; Page et al., 2021;                                                                                                                                                                                                                                                                                                                                        |
|                                              | Realist syntheses ( <i>n</i> = 1)            | Wong et al., 2013;                                                                                                                                                                                                                                                                                                                                                                                                                                                                                                                      |
|                                              | Living evidence ( <i>n</i> = 1)              | Bendersky et al., 2022;                                                                                                                                                                                                                                                                                                                                                                                                                                                                                                                 |
| Data Management and Analysis ( <i>n</i> = 2) | Statistical methods ( <i>n</i> = 9)          | Crawford et al., 2010; Kalil et al., 2010; Kent et al., 2010; Kruschke, 2021; Jackson, 2010; Lang & Altman, 2015;                                                                                                                                                                                                                                                                                                                                                                                                                       |

|                                                    |                                              |                                                                                                                          |
|----------------------------------------------------|----------------------------------------------|--------------------------------------------------------------------------------------------------------------------------|
|                                                    |                                              | Lee et al., 2021; Sung et al., 2005; Wang et al., 2007;                                                                  |
|                                                    | Data quality ( $n = 5$ )                     | Biering-Sorensen et al., 2023; Hrynaskiewicz et al., 2010; Kent et al., 2010; Kotecha et al., 2022; Sterne et al., 2009; |
| Stakeholder Perspectives ( $n = 5$ )               | Meta-narrative ( $n = 1$ )                   | Wong et al., 2013;                                                                                                       |
|                                                    | Patient Reported Outcomes ( $n = 3$ )        | Calvert et al., 2013; Gagnier et al., 2021; Hou et al., 2013;                                                            |
|                                                    | Quality of Life ( $n = 1$ )                  | Staquet et al., 1996;                                                                                                    |
|                                                    | Anecdotes ( $n = 1$ )                        | Aronson, 2003;                                                                                                           |
|                                                    | Participatory action ( $n = 1$ )             | Smith et al., 2010;                                                                                                      |
| Knowledge Translation ( $n = 1$ )                  | Knowledge Translation ( $n = 2$ )            | Albrecht et al., 2013; Brown et al., 2006;                                                                               |
| Clinical Topics ( $n = 2$ )                        | Palliative ( $n = 1$ )                       | Currow et al., 2012;                                                                                                     |
|                                                    | Surgery ( $n = 2$ )                          | Agha et al., 2020; Bilbro et al., 2021;                                                                                  |
| Health Equity ( $n = 1$ )                          | Diversity, equity, and inclusion ( $n = 3$ ) | Huria et al., 2019; Welch et al., 2012;                                                                                  |
| Resource Allocation ( $n = 3$ )                    | Health economics ( $n = 1$ )                 | Ramsey et al., 2005;                                                                                                     |
|                                                    | Priority setting ( $n = 1$ )                 | Tong et al., 2019;                                                                                                       |
|                                                    | Quality improvement ( $n = 1$ )              | Ogrinc et al., 2016;                                                                                                     |
| Measurement and Instrument Development ( $n = 3$ ) | Instrument development ( $n = 1$ )           | Hou et al., 2013;                                                                                                        |
|                                                    | Measurement ( $n = 2$ )                      | Gagnier et al., 2021; Mallinson et al., 2022;                                                                            |
|                                                    | Reliability ( $n = 2$ )                      | Kottner et al., 2011; Sanchez-Meca et al., 2021;                                                                         |
| Diagnostics ( $n = 4$ )                            | Diagnostic Test Accuracy ( $n = 4$ )         | Bossuyt et al., 2015; Cohen et al., 2017; Cohen et al., 2021; McInnes et al., 2018                                       |
|                                                    | Biomedical Imaging ( $n = 3$ )               | Ekhtiari et al., 2022; Mintz et al., 2001; ter Haar et al., 2011                                                         |
|                                                    | fMRI ( $n = 1$ )                             | Ekhtiari et al., 2022;                                                                                                   |

|                                                 |                                      |                                                                                                                                                                                             |
|-------------------------------------------------|--------------------------------------|---------------------------------------------------------------------------------------------------------------------------------------------------------------------------------------------|
|                                                 | Ultrasound ( $n = 2$ )               | Mintz et al., 2001; ter Haar et al., 2011                                                                                                                                                   |
| Treatment ( $n = 3$ )                           | Biomedical intervention ( $n = 1$ )  | Vitek et al., 2010                                                                                                                                                                          |
|                                                 | DBS ( $n = 1$ )                      | Vitek et al., 2010                                                                                                                                                                          |
|                                                 | Interventions ( $n = 9$ )            | Bilbro et al., 2021; Eysenbach & Group, 2011; Gates et al., 2022; Hoffmann et al., 2014; Kelly et al., 2007; Norgeot et al., 2020; Rhon et al., 2022; Rivera et al., 2020; Ros et al., 2020 |
| Standards for Published Manuscripts ( $n = 4$ ) | Abstracts ( $n = 7$ )                | Boutron et al., 2017; Cohen et al., 2017; Cohen et al., 2021; Heus et al., 2020; Hopewell et al., 2008; Page et al., 2021; von Elm et al., 2007;                                            |
|                                                 | Adverse events ( $n = 1$ )           | Kelly et al., 2007;                                                                                                                                                                         |
|                                                 | Medical Images ( $n = 2$ )           | Lang et al., 2012; Siontis et al., 2010;                                                                                                                                                    |
|                                                 | Scientific Figures ( $n = 2$ )       | Pocock et al., 2007; Puhan et al., 2006;                                                                                                                                                    |
| Advancements in Health Technology ( $n = 4$ )   | Electronic Health Record ( $n = 2$ ) | Kotecha et al., 2022;                                                                                                                                                                       |
|                                                 | Telehealth ( $n = 2$ )               | Eysenbach et al., 2011; Rhon et al., 2022;                                                                                                                                                  |
|                                                 | Machine Learning ( $n = 1$ )         | Norgeot et al., 2020;                                                                                                                                                                       |
|                                                 | Artificial Intelligence ( $n = 3$ )  | Norgeot et al., 2020; Rhon et al., 2022; Rivera et al., 2020;                                                                                                                               |

## References:

- Agha, R. A., Sohrabi, C., Mathew, G., Franchi, T., Kerwan, A., O'Neill, N., & Group, P. (2020). The PROCESS 2020 Guideline: Updating Consensus Preferred Reporting Of CasESeries in Surgery (PROCESS) Guidelines. *International Journal of Surgery*, 84, 231-235. <https://doi.org/10.1016/j.ijssu.2020.11.005>
- Albrecht, L., Archibald, M., Arseneau, D., & Scott, S. D. (2013). Development of a checklist to assess the quality of reporting of knowledge translation interventions using the Workgroup for Intervention Development and Evaluation Research

(WIDER) recommendations. *Implementation Science*, 8, 52.

<https://doi.org/10.1186/1748-5908-8-52>

Aronson, J. K. (2003). Anecdotes as evidence. *BMJ British Medical Journal*, 326(7403), 1346. <https://doi.org/10.1136/bmj.326.7403.1346>

Bendersky, J., Auladell-Rispau, A., Urrutia, G., & Rojas-Reyes, M. X. (2022). Methods for developing and reporting living evidence synthesis. *Journal of Clinical Epidemiology*, 152, 89-100. <https://doi.org/10.1016/j.jclinepi.2022.09.020>

Biering-Sorensen, F., Charlifue, S., Chen, Y., New, P. W., Noonan, V., Post, M. W. M., Rupp, R., & Vogel, L. (2023). International Spinal Cord Injury Core Data Set (version 3.0)-including standardization of reporting. *Spinal Cord*, 61(1), 65-68. <https://doi.org/10.1038/s41393-022-00862-2>

Bilbro, N. A., Hirst, A., Paez, A., Vasey, B., Pufulete, M., Sedrakyan, A., McCulloch, P., & Group, I. C. R. G. W. (2021). The IDEAL Reporting Guidelines: A Delphi Consensus Statement Stage Specific Recommendations for Reporting the Evaluation of Surgical Innovation. *Annals of Surgery*, 273(1), 82-85. <https://doi.org/10.1097/SLA.0000000000004180>

Bossuyt, P. M., Reitsma, J. B., Bruns, D. E., Gatsonis, C. A., Glasziou, P. P., Irwig, L., Lijmer, J. G., Moher, D., Rennie, D., de Vet, H. C., Kressel, H. Y., Rifai, N., Golub, R. M., Altman, D. G., Hooft, L., Korevaar, D. A., Cohen, J. F., & Group, S. (2015). STARD 2015: an updated list of essential items for reporting diagnostic accuracy studies. *BMJ British Medical Journal*, 351, h5527. <https://doi.org/10.1136/bmj.h5527>

Boutron, I., Altman, D. G., Moher, D., Schulz, K. F., Ravaud, P., & Group, C. N. (2017).

CONSORT Statement for Randomized Trials of Nonpharmacologic Treatments:

A 2017 Update and a CONSORT Extension for Nonpharmacologic Trial

Abstracts. *Annals of Internal Medicine*, 167(1), 40-47.

<https://doi.org/10.7326/M17-0046>

Brown, P., Brunnhuber, K., Chalkidou, K., Chalmers, I., Clarke, M., Fenton, M., Forbes,

C., Glanville, J., Hicks, N. J., Moody, J., Twaddle, S., Timimi, H., & Young, P.

(2006). How to formulate research recommendations. *BMJ British Medical*

*Journal*, 333(7572), 804-806. <https://doi.org/10.1136/bmj.38987.492014.94>

Burns, K. E., Duffett, M., Kho, M. E., Meade, M. O., Adhikari, N. K., Sinuff, T., Cook, D.

J., & Group, A. (2008). A guide for the design and conduct of self-administered

surveys of clinicians. *Canadian Medical Association Journal*, 179(3), 245-252.

<https://doi.org/10.1503/cmaj.080372>

Calvert, M., Blazeby, J., Altman, D. G., Revicki, D. A., Moher, D., Brundage, M. D., &

Group, C. P. (2013). Reporting of patient-reported outcomes in randomized trials:

the CONSORT PRO extension. *JAMA Journal of the American Medical*

*Association*, 309(8), 814-822. <https://doi.org/10.1001/jama.2013.879>

Campbell, M. K., Piaggio, G., Elbourne, D. R., Altman, D. G., & Group, C. (2012).

Consort 2010 statement: extension to cluster randomised trials. *BMJ British*

*Medical Journal*, 345, e5661. <https://doi.org/10.1136/bmj.e5661>

Centre for Reviews and Dissemination, U. o. Y. (2009). *Systematic Reviews. CRD's*

*guidance for undertaking reviews in health care.* .

[http://www.york.ac.uk/inst/crd/index\\_guidance.htm](http://www.york.ac.uk/inst/crd/index_guidance.htm)

- Cohen, J. F., Deeks, J. J., Hooft, L., Salameh, J. P., Korevaar, D. A., Gatsonis, C., Hopewell, S., Hunt, H. A., Hyde, C. J., Leeflang, M. M., Macaskill, P., McGrath, T. A., Moher, D., Reitsma, J. B., Rutjes, A. W. S., Takwoingi, Y., Tonelli, M., Whiting, P., Willis, B. H., . . . McInnes, M. D. F. (2021). Preferred reporting items for journal and conference abstracts of systematic reviews and meta-analyses of diagnostic test accuracy studies (PRISMA-DTA for Abstracts): checklist, explanation, and elaboration. *BMJ British Medical Journal*, 372, n265.  
<https://doi.org/10.1136/bmj.n265>
- Cohen, J. F., Korevaar, D. A., Gatsonis, C. A., Glasziou, P. P., Hooft, L., Moher, D., Reitsma, J. B., de Vet, H. C., Bossuyt, P. M., & Group, S. (2017). STARD for Abstracts: essential items for reporting diagnostic accuracy studies in journal or conference abstracts. *BMJ British Medical Journal*, 358, j3751.  
<https://doi.org/10.1136/bmj.j3751>
- Crawford, J. R., Garthwaite, P. H., & Porter, S. (2010). Point and interval estimates of effect sizes for the case-controls design in neuropsychology: rationale, methods, implementations, and proposed reporting standards. *Cognitive Neuropsychology*, 27(3), 245-260. <https://doi.org/10.1080/02643294.2010.513967>
- Currow, D. C., Tieman, J. J., Greene, A., Zafar, S. Y., Wheeler, J. L., & Abernethy, A. P. (2012). Refining a checklist for reporting patient populations and service characteristics in hospice and palliative care research. *Journal of Pain Symptom Management*, 43(5), 902-910. <https://doi.org/10.1016/j.jpainsymman.2011.05.015>
- Dimairo, M., Pallmann, P., Wason, J., Todd, S., Jaki, T., Julious, S. A., Mander, A. P., Weir, C. J., Koenig, F., Walton, M. K., Nicholl, J. P., Coates, E., Biggs, K.,

- Hamasaki, T., Proschan, M. A., Scott, J. A., Ando, Y., Hind, D., Altman, D. G., & Group, A. C. E. C. (2020). The Adaptive designs CONSORT Extension (ACE) statement: a checklist with explanation and elaboration guideline for reporting randomised trials that use an adaptive design. *BMJ British Medical Journal*, 369, m115. <https://doi.org/10.1136/bmj.m115>
- Dwan, K., Li, T., Altman, D. G., & Elbourne, D. (2019). CONSORT 2010 statement: extension to randomised crossover trials. *BMJ British Medical Journal*, 366, l4378. <https://doi.org/10.1136/bmj.l4378>
- Ekhtiari, H., Ghobadi-Azbari, P., Thielscher, A., Antal, A., Li, L. M., Shereen, A. D., Cabral-Calderin, Y., Keeser, D., Bergmann, T. O., Jamil, A., Violante, I. R., Almeida, J., Meinzer, M., Siebner, H. R., Woods, A. J., Stagg, C. J., Abend, R., Antonenko, D., Auer, T., . . . Bikson, M. (2022). A checklist for assessing the methodological quality of concurrent tES-fMRI studies (ContES checklist): a consensus study and statement. *Nature Protocols*, 17(3), 596-617. <https://doi.org/10.1038/s41596-021-00664-5>
- Eldridge, S. M., Chan, C. L., Campbell, M. J., Bond, C. M., Hopewell, S., Thabane, L., Lancaster, G. A., & group, P. c. (2016). CONSORT 2010 statement: extension to randomised pilot and feasibility trials. *Pilot Feasibility Studies*, 2, 64. <https://doi.org/10.1186/s40814-016-0105-8>
- Eysenbach, G. (2004). Improving the quality of Web surveys: the Checklist for Reporting Results of Internet E-Surveys (CHERRIES). *Journal of Med Internet Research*, 6(3), e34. <https://doi.org/10.2196/jmir.6.3.e34>

- Eysenbach, G., & CONSORT-EHealth Group. (2011). CONSORT-EHEALTH: improving and standardizing evaluation reports of Web-based and mobile health interventions. *Journal of Medical Internet Research*, 13(4), e126.  
<https://doi.org/10.2196/jmir.1923>
- Gagnier, J. J., Kienle, G., Altman, D. G., Moher, D., Sox, H., Riley, D., & Group, C. (2013). The CARE guidelines: consensus-based clinical case reporting guideline development. *BMJ British Medical Journal Case Rep*, 2013.  
<https://doi.org/10.1136/bcr-2013-201554>
- Gagnier, J. J., Lai, J., Mokkink, L. B., & Terwee, C. B. (2021). COSMIN reporting guideline for studies on measurement properties of patient-reported outcome measures. *Quality of Life Research*, 30(8), 2197-2218.  
<https://doi.org/10.1007/s11136-021-02822-4>
- Gates, M., Gates, A., Pieper, D., Fernandes, R. M., Tricco, A. C., Moher, D., Brennan, S. E., Li, T., Pollock, M., Lunny, C., Sepulveda, D., McKenzie, J. E., Scott, S. D., Robinson, K. A., Matthias, K., Bougioukas, K. I., Fusar-Poli, P., Whiting, P., Moss, S. J., & Hartling, L. (2022). Reporting guideline for overviews of reviews of healthcare interventions: development of the PRIOR statement. *BMJ British Medical Journal*, 378, e070849. <https://doi.org/10.1136/bmj-2022-070849>
- Hemming, K., Taljaard, M., McKenzie, J. E., Hooper, R., Copas, A., Thompson, J. A., Dixon-Woods, M., Aldcroft, A., Doussau, A., Grayling, M., Kristunas, C., Goldstein, C. E., Campbell, M. K., Girling, A., Eldridge, S., Campbell, M. J., Lilford, R. J., Weijer, C., Forbes, A. B., & Grimshaw, J. M. (2018). Reporting of stepped wedge cluster randomised trials: extension of the CONSORT 2010



- statement with explanation and elaboration. *BMJ British Medical Journal*, 363, k1614. <https://doi.org/10.1136/bmj.k1614>
- Heus, P., Reitsma, J. B., Collins, G. S., Damen, J., Scholten, R., Altman, D. G., Moons, K. G. M., & Hooft, L. (2020). Transparent Reporting of Multivariable Prediction Models in Journal and Conference Abstracts: TRIPOD for Abstracts. *Annals of Internal Medicine*. <https://doi.org/10.7326/M20-0193>
- Higgins, J. P. T., Thomas, J., Chandler, J., Cumpston, M., Li, T., Page, M. J., & Welch, V. A. (2020). *Cochrane Handbook for Systematic Reviews of Interventions Version 6.1*. Cochrane Collaboration. <https://training.cochrane.org/cochrane-handbook-systematic-reviews-interventions>
- Hoffmann, T. C., Glasziou, P. P., Boutron, I., Milne, R., Perera, R., Moher, D., Altman, D. G., Barbour, V., Macdonald, H., Johnston, M., Lamb, S. E., Dixon-Woods, M., McCulloch, P., Wyatt, J. C., Chan, A. W., & Michie, S. (2014). Better reporting of interventions: template for intervention description and replication (TIDieR) checklist and guide. *BMJ British Medical Journal*, 348, g1687. <https://doi.org/10.1136/bmj.g1687>
- Hopewell, S., Clarke, M., Moher, D., Wager, E., Middleton, P., Altman, D. G., Schulz, K. F., & Group, C. (2008). CONSORT for reporting randomised trials in journal and conference abstracts. *Lancet*, 371(9609), 281-283. [https://doi.org/10.1016/S0140-6736\(07\)61835-2](https://doi.org/10.1016/S0140-6736(07)61835-2)
- Hou, Z. K., Liu, F. B., Fang, J. Q., Li, X. Y., Li, L. J., & Lin, C. H. (2013). Advising on Preferred Reporting Items for patient-reported outcome instrument development:

the PRIPROID. *Chinese Journal of Integrative Medicine*, 19(3), 172-181.

<https://doi.org/10.1007/s11655-012-1104-0>

Howick, J., Webster, R. K., Rees, J. L., Turner, R., Macdonald, H., Price, A., Evers, A. W. M., Bishop, F., Collins, G. S., Bokelmann, K., Hopewell, S., Kottnerus, A., Lamb, S., Madigan, C., Napadow, V., Papanikitas, A. N., & Hoffmann, T. (2020). TIDieR-Placebo: A guide and checklist for reporting placebo and sham controls. *PLoS Med*, 17(9), e1003294. <https://doi.org/10.1371/journal.pmed.1003294>

Hrynaszkiewicz, I., Norton, M. L., Vickers, A. J., & Altman, D. G. (2010). Preparing raw clinical data for publication: guidance for journal editors, authors, and peer reviewers. *BMJ British Medical Journal*, 340, c181. <https://doi.org/10.1136/bmj.c181>

Huria, T., Palmer, S. C., Pitama, S., Beckert, L., Lacey, C., Ewen, S., & Smith, L. T. (2019). Consolidated criteria for strengthening reporting of health research involving indigenous peoples: the CONSIDER statement. *BMC Medical Research Methodology*, 19(1), 173. <https://doi.org/10.1186/s12874-019-0815-8>

Hutton, B., Salanti, G., Caldwell, D. M., Chaimani, A., Schmid, C. H., Cameron, C., Ioannidis, J. P., Straus, S., Thorlund, K., Jansen, J. P., Mulrow, C., Catala-Lopez, F., Gotzsche, P. C., Dickersin, K., Boutron, I., Altman, D. G., & Moher, D. (2015). The PRISMA extension statement for reporting of systematic reviews incorporating network meta-analyses of health care interventions: checklist and explanations. *Annals of Internal Medicine*, 162(11), 777-784. <https://doi.org/10.7326/M14-2385>

- Jackson, D. L. (2010). Reporting results of latent growth modeling and multilevel modeling analyses: some recommendations for rehabilitation psychology. *Rehabil Psychol*, 55(3), 272-285. <https://doi.org/10.1037/a0020462>
- Junqueira, D. R., Zorzela, L., Golder, S., Loke, Y., Gagnier, J. J., Julious, S. A., Li, T., Mayo-Wilson, E., Pham, B., Phillips, R., Santaguida, P., Scherer, R. W., Gotzsche, P. C., Moher, D., Ioannidis, J. P. A., Vohra, S., & Group, C. H. (2023). CONSORT Harms 2022 statement, explanation, and elaboration: updated guideline for the reporting of harms in randomised trials. *BMJ British Medical Journal*, 381, e073725. <https://doi.org/10.1136/bmj-2022-073725>
- Juszczak, E., Altman, D. G., Hopewell, S., & Schulz, K. (2019). Reporting of Multi-Arm Parallel-Group Randomized Trials: Extension of the CONSORT 2010 Statement. *JAMA Journal of the American Medical Association*, 321(16), 1610-1620. <https://doi.org/10.1001/jama.2019.3087>
- Kalil, A. C., Mattei, J., Florescu, D. F., Sun, J., & Kalil, R. S. (2010). Recommendations for the assessment and reporting of multivariable logistic regression in transplantation literature. *American Journal of Transplantation*, 10(7), 1686-1694. <https://doi.org/10.1111/j.1600-6143.2010.03141.x>
- Kelley, K., Clark, B., Brown, V., & Sitzia, J. (2003). Good practice in the conduct and reporting of survey research. *International Journal of Quality in Health Care*, 15(3), 261-266. <https://doi.org/10.1093/intqhc/mzg031>
- Kelly, W. N., Arellano, F. M., Barnes, J., Bergman, U., Edwards, R. I., Fernandez, A. M., Freedman, S. B., Goldsmith, D. I., Huang, K. A., Jones, J. K., McLeay, R., Moore, N., Stather, R. H., Trenque, T., Troutman, W. G., van Puijenbroek, E.,

- Williams, F., Wise, R. P. (2007). Guidelines for submitting adverse event reports for publication. *Drug Safety*, 30(5), 367-373. <https://doi.org/10.2165/00002018-200730050-00001>
- Kent, D. M., Rothwell, P. M., Ioannidis, J. P., Altman, D. G., & Hayward, R. A. (2010). Assessing and reporting heterogeneity in treatment effects in clinical trials: a proposal. *Trials*, 11, 85. <https://doi.org/10.1186/1745-6215-11-85>
- Kotecha, D., Asselbergs, F. W., Achenbach, S., Anker, S. D., Atar, D., Baigent, C., Banerjee, A., Beger, B., Brobert, G., Casadei, B., Ceccarelli, C., Cowie, M. R., Crea, F., Cronin, M., Denaxas, S., Derix, A., Fitzsimons, D., Fredriksson, M., Gale, C. P., . . . Group, C.-E. I. C. (2022). CODE-EHR best-practice framework for the use of structured electronic health-care records in clinical research. *Lancet Digital Health*, 4(10), e757-e764. [https://doi.org/10.1016/S2589-7500\(22\)00151-0](https://doi.org/10.1016/S2589-7500(22)00151-0)
- Kottner, J., Audige, L., Brorson, S., Donner, A., Gajewski, B. J., Hrobjartsson, A., Roberts, C., Shoukri, M., & Streiner, D. L. (2011). Guidelines for Reporting Reliability and Agreement Studies (GRRAS) were proposed. *Journal of Clinical Epidemiology*, 64(1), 96-106. <https://doi.org/10.1016/j.jclinepi.2010.03.002>
- Kruschke, J. K. (2021). Bayesian Analysis Reporting Guidelines. *Nat Hum Behav*, 5(10), 1282-1291. <https://doi.org/10.1038/s41562-021-01177-7>
- Kwakkenbos, L., Imran, M., McCall, S. J., McCord, K. A., Frobert, O., Hemkens, L. G., Zwarenstein, M., Relton, C., Rice, D. B., Langan, S. M., Benchimol, E. I., Thabane, L., Campbell, M. K., Sampson, M., Erlinge, D., Verkooijen, H. M., Moher, D., Boutron, I., Ravaud, P., . . . Thoms, B. D. (2021). CONSORT

extension for the reporting of randomised controlled trials conducted using cohorts and routinely collected data (CONSORT-ROUTINE): checklist with explanation and elaboration. *BMJ British Medical Journal*, 373, n857.

<https://doi.org/10.1136/bmj.n857>

Lang, T. A., & Altman, D. G. (2015). Basic statistical reporting for articles published in biomedical journals: the "Statistical Analyses and Methods in the Published Literature" or the SAMPL Guidelines. *International Journal of Nursing Studies*, 52(1), 5-9. <https://doi.org/10.1016/j.ijnurstu.2014.09.006>

Lang, T. A., Talerico, C., & Siontis, G. C. M. (2012). Documenting clinical and laboratory images in publications: the CLIP principles. *Chest*, 141(6), 1626-1632.  
<https://doi.org/10.1378/chest.11-1800>

Lee, H., Cashin, A. G., Lamb, S. E., Hopewell, S., Vansteelandt, S., VanderWeele, T. J., MacKinnon, D. P., Mansell, G., Collins, G. S., Golub, R. M., McAuley, J. H., group, A. G., Localio, A. R., van Amelsvoort, L., Guallar, E., Rijnhart, J., Goldsmith, K., Fairchild, A. J., Lewis, C. C., . . . Henschke, N. (2021). A Guideline for Reporting Mediation Analyses of Randomized Trials and Observational Studies: The AGRema Statement. *JAMA Journal of the American Medical Association*, 326(11), 1045-1056. <https://doi.org/10.1001/jama.2021.14075>

Liu, X., Rivera, S. C., Moher, D., Calvert, M. J., Denniston, A. K., Spirit, A. I., & Group, C.-A. W. (2020). Reporting guidelines for clinical trial reports for interventions involving artificial intelligence: the CONSORT-AI Extension. *BMJ British Medical Journal*, 370, m3164. <https://doi.org/10.1136/bmj.m3164>

- Mallinson, T., Kozlowski, A. J., Johnston, M. V., Weaver, J., Terhorst, L., Grampurohit, N., Juengst, S., Ehrlich-Jones, L., Heinemann, A. W., Melvin, J., Sood, P., & Van de Winckel, A. (2022). Rasch Reporting Guideline for Rehabilitation Research (RULER): the RULER Statement. *Archives of Physical Medicine and Rehabilitation*, 103(7), 1477-1486. <https://doi.org/10.1016/j.apmr.2022.03.013>
- McInnes, M. D. F., Moher, D., Thombs, B. D., McGrath, T. A., Bossuyt, P. M., and the, P.-D. T. A. G., Clifford, T., Cohen, J. F., Deeks, J. J., Gatsonis, C., Hooft, L., Hunt, H. A., Hyde, C. J., Korevaar, D. A., Leeflang, M. M. G., Macaskill, P., Reitsma, J. B., Rodin, R., Rutjes, A. W. S., . . . Willis, B. H. (2018). Preferred Reporting Items for a Systematic Review and Meta-analysis of Diagnostic Test Accuracy Studies: The PRISMA-DTA Statement. *JAMA Journal of the American Medical Association*, 319(4), 388-396. <https://doi.org/10.1001/jama.2017.19163>
- Mintz, G. S., Nissen, S. E., Anderson, W. D., Bailey, S. R., Erbel, R., Fitzgerald, P. J., Pinto, F. J., Rosenfield, K., Siegel, R. J., Tuzcu, E. M., & Yock, P. G. (2001). American College of Cardiology Clinical Expert Consensus Document on Standards for Acquisition, Measurement and Reporting of Intravascular Ultrasound Studies (IVUS). A report of the American College of Cardiology Task Force on Clinical Expert Consensus Documents. *Journal of the American College of Cardiology*, 37(5), 1478-1492. [https://doi.org/10.1016/s0735-1097\(01\)01175-5](https://doi.org/10.1016/s0735-1097(01)01175-5)
- Norgeot, B., Quer, G., Beaulieu-Jones, B. K., Torkamani, A., Dias, R., Gianfrancesco, M., Arnaout, R., Kohane, I. S., Saria, S., Topol, E., Obermeyer, Z., Yu, B., & Butte, A. J. (2020). Minimum information about clinical artificial intelligence

modeling: the MI-CLAIM checklist. *Nature Medicine*, 26(9), 1320-1324.

<https://doi.org/10.1038/s41591-020-1041-y>

Ogrinc, G., Davies, L., Goodman, D., Batalden, P., Davidoff, F., & Stevens, D. (2016).

SQUIRE 2.0 (Standards for QUality Improvement Reporting Excellence): revised publication guidelines from a detailed consensus process. *BMJ British Medical Journal Qual Saf*, 25(12), 986-992. <https://doi.org/10.1136/bmjqs-2015-004411>

Orkin, A. M., Gill, P. J., Ghera, D., Campbell, L., Sugarman, J., Emsley, R., Steg, P. G.,

Weijer, C., Simes, J., Rombey, T., Williams, H. C., Wittes, J., Moher, D.,

Richards, D. P., Kasamon, Y., Getz, K., Hopewell, S., Dickersin, K., Wu, T., . . .

Group, C. (2021). Guidelines for Reporting Trial Protocols and Completed Trials

Modified Due to the COVID-19 Pandemic and Other Extenuating Circumstances:

The CONSERVE 2021 Statement. *JAMA Journal of the American Medical*

*Association*, 326(3), 257-265. <https://doi.org/10.1001/jama.2021.9941>

Page, M. J., McKenzie, J. E., Bossuyt, P. M., Boutron, I., Hoffmann, T. C., Mulrow, C.

D., Shamseer, L., Tetzlaff, J. M., Akl, E. A., Brennan, S. E., Chou, R., Glanville,

J., Grimshaw, J. M., Hrobjartsson, A., Lalu, M. M., Li, T., Loder, E. W., Mayo-

Wilson, E., McDonald, S., . . . Moher, D. (2021). The PRISMA 2020 statement:

an updated guideline for reporting systematic reviews. *BMJ British Medical*

*Journal*, 372, n71. <https://doi.org/10.1136/bmj.n71>

Pandis, N., Chung, B., Scherer, R. W., Elbourne, D., & Altman, D. G. (2017).

CONSORT 2010 statement: extension checklist for reporting within person

randomised trials. *BMJ British Medical Journal*, 357, j2835.

<https://doi.org/10.1136/bmj.j2835>

- Piaggio, G., Elbourne, D. R., Pocock, S. J., Evans, S. J., Altman, D. G., & Group, C. (2012). Reporting of noninferiority and equivalence randomized trials: extension of the CONSORT 2010 statement. *JAMA Journal of the American Medical Association*, 308(24), 2594-2604. <https://doi.org/10.1001/jama.2012.87802>
- Pocock, S. J., Trivison, T. G., & Wruck, L. M. (2007). Figures in clinical trial reports: current practice & scope for improvement. *Trials*, 8, 36. <https://doi.org/10.1186/1745-6215-8-36>
- Portell, M., Anguera, M. T., Chacon-Moscoso, S., & Sanduvete-Chaves, S. (2015). Guidelines for reporting evaluations based on observational methodology. *Psicothema*, 27(3), 283-289. <https://doi.org/10.7334/psicothema2014.276>
- Puhan, M. A., ter Riet, G., Eichler, K., Steurer, J., & Bachmann, L. M. (2006). More medical journals should inform their contributors about three key principles of graph construction. *Journal of Clinical Epidemiology*, 59(10), 1017-1022. <https://doi.org/10.1016/j.jclinepi.2005.12.016>
- Ramsey, S., Willke, R., Briggs, A., Brown, R., Buxton, M., Chawla, A., Cook, J., Glick, H., Liljas, B., Petitti, D., & Reed, S. (2005). Good research practices for cost-effectiveness analysis alongside clinical trials: the ISPOR RCT-CEA Task Force report. *Value in Health*, 8(5), 521-533. <https://doi.org/10.1111/j.1524-4733.2005.00045.x>
- Reeves, B. C., & Gaus, W. (2004). Guidelines for reporting non-randomised studies. *Research in Complimentary Medicine*, 11 Suppl 1, 46-52. <https://doi.org/10.1159/000080576>



- Rhon, D. I., Fritz, J. M., Kerns, R. D., McGeary, D. D., Coleman, B. C., Farrokhi, S., Burgess, D. J., Goertz, C. M., Taylor, S. L., & Hoffmann, T. (2022). TIDieR-telehealth: precision in reporting of telehealth interventions used in clinical trials - unique considerations for the Template for the Intervention Description and Replication (TIDieR) checklist. *BMC Medical Research Methodology*, 22(1), 161. <https://doi.org/10.1186/s12874-022-01640-7>
- Riley, R. D., Lambert, P. C., & Abo-Zaid, G. (2010). Meta-analysis of individual participant data: rationale, conduct, and reporting. *BMJ British Medical Journal*, 340, c221. <https://doi.org/10.1136/bmj.c221>
- Rivera, S. C., Liu, X., Chan, A. W., Denniston, A. K., Calvert, M. J., Spirit, A. I., & Group, C.-A. W. (2020). Guidelines for clinical trial protocols for interventions involving artificial intelligence: the SPIRIT-AI Extension. *BMJ British Medical Journal*, 370, m3210. <https://doi.org/10.1136/bmj.m3210>
- Ros, T., Enriquez-Geppert, S., Zotev, V., Young, K. D., Wood, G., Whitfield-Gabrieli, S., Wan, F., Vuilleumier, P., Vialatte, F., Van De Ville, D., Todder, D., Surmeli, T., Sulzer, J. S., Strehl, U., Sterman, M. B., Steiner, N. J., Sorger, B., Soekadar, S. R., Sitaram, R., . . . Thibault, R. T. (2020). Consensus on the reporting and experimental design of clinical and cognitive-behavioural neurofeedback studies (CRED-nf checklist). *Brain*, 143(6), 1674-1685. <https://doi.org/10.1093/brain/awaa009>
- Sanchez-Meca, J., Marin-Martinez, F., Lopez-Lopez, J. A., Nunez-Nunez, R. M., Rubio-Aparicio, M., Lopez-Garcia, J. J., Lopez-Pina, J. A., Blazquez-Rincon, D. M., Lopez-Ibanez, C., & Lopez-Nicolas, R. (2021). Improving the reporting quality of

- reliability generalization meta-analyses: The REGEMA checklist. *Research Synthesis Methods*, 12(4), 516-536. <https://doi.org/10.1002/jrsm.1487>
- Schulz, K. F., Altman, D. G., & Moher, D. (2010). CONSORT 2010 statement: Updated guidelines for reporting parallel group randomised trials. *Journal of Pharmacology & Pharmacotherapy*, 1(2), 100-107. <https://doi.org/10.4103/0976-500X.72352>
- Sharma, A., Minh Duc, N. T., Luu Lam Thang, T., Nam, N. H., Ng, S. J., Abbas, K. S., Huy, N. T., Marusic, A., Paul, C. L., Kwok, J., Karbwang, J., de Waure, C., Drummond, F. J., Kizawa, Y., Taal, E., Vermeulen, J., Lee, G. H. M., Gyedu, A., To, K. G., . . . Karamouzian, M. (2021). A Consensus-Based Checklist for Reporting of Survey Studies (CROSS). *Journal of General Internal Medicine*, 36(10), 3179-3187. <https://doi.org/10.1007/s11606-021-06737-1>
- Siontis, G. C., Patsopoulos, N. A., Vlahos, A. P., & Ioannidis, J. P. (2010). Selection and presentation of imaging figures in the medical literature. *PLoS One*, 5(5), e10888. <https://doi.org/10.1371/journal.pone.0010888>
- Smith, L., Rosenzweig, L., & Schmidt, M. (2010). Best practices in the reporting of participatory action research: Embracing both the forest and the trees. *The Counselling Psychologist*, 38(8), 1115-1138.
- Sorinola, O., Olufowobi, O., Coomarasamy, A., & Khan, K. S. (2004). Instructions to authors for case reporting are limited: a review of a core journal list. *BMC Medical Education*, 4, 4. <https://doi.org/10.1186/1472-6920-4-4>

- Staquet, M., Berzon, R., Osoba, D., & Machin, D. (1996). Guidelines for reporting results of quality of life assessments in clinical trials. *Quality of Life Research*, 5(5), 496-502. <https://doi.org/10.1007/BF00540022>
- Sterne, J. A., White, I. R., Carlin, J. B., Spratt, M., Royston, P., Kenward, M. G., Wood, A. M., & Carpenter, J. R. (2009). Multiple imputation for missing data in epidemiological and clinical research: potential and pitfalls. *BMJ British Medical Journal*, 338, b2393. <https://doi.org/10.1136/bmj.b2393>
- Sung, L., Hayden, J., Greenberg, M. L., Koren, G., Feldman, B. M., & Tomlinson, G. A. (2005). Seven items were identified for inclusion when reporting a Bayesian analysis of a clinical study. *Journal of Clinical Epidemiology*, 58(3), 261-268. <https://doi.org/10.1016/j.jclinepi.2004.08.010>
- ter Haar, G., Shaw, A., Pye, S., Ward, B., Bottomley, F., Nolan, R., & Coady, A. M. (2011). Guidance on reporting ultrasound exposure conditions for bio-effects studies. *Ultrasound in Medicine & Biology*, 37(2), 177-183. <https://doi.org/10.1016/j.ultrasmedbio.2010.10.021>
- Tong, A., Synnot, A., Crowe, S., Hill, S., Matus, A., Scholes-Robertson, N., Oliver, S., Cowan, K., Nasser, M., Bhaumik, S., Gutman, T., Baumgart, A., & Craig, J. C. (2019). Reporting guideline for priority setting of health research (REPRISE). *BMC Medical Research Methodology*, 19(1), 243. <https://doi.org/10.1186/s12874-019-0889-3>
- Vitek, J. L., Lyons, K. E., Bakay, R., Benabid, A. L., Deuschl, G., Hallett, M., Kurlan, R., Pancrazio, J. J., Rezai, A., Walter, B. L., & Lang, A. E. (2010). Standard guidelines for publication of deep brain stimulation studies in Parkinson's disease

(Guide4DBS-PD). *Movement Disorders*, 25(11), 1530-1537.

<https://doi.org/10.1002/mds.23151>

von Elm, E., Altman, D. G., Egger, M., Pocock, S. J., Gøtzsche, P. C., Vandenbroucke, J. P., & Initiative, S. (2007). The Strengthening the Reporting of Observational Studies in Epidemiology (STROBE) statement: guidelines for reporting observational studies. *Annals of Internal Medicine*, 147(8), 573-577.

<https://doi.org/10.7326/0003-4819-147-8-200710160-00010>

Wang, R., Lagakos, S. W., Ware, J. H., Hunter, D. J., & Drazen, J. M. (2007). Statistics in medicine--reporting of subgroup analyses in clinical trials. *New England Journal of Medicine*, 357(21), 2189-2194. <https://doi.org/10.1056/NEJMSr077003>

Welch, V., Petticrew, M., Tugwell, P., Moher, D., O'Neill, J., Waters, E., White, H., & group, P. R.-E. B. (2012). PRISMA-Equity 2012 extension: reporting guidelines for systematic reviews with a focus on health equity. *PLoS Medicine*, 9(10), e1001333. <https://doi.org/10.1371/journal.pmed.1001333>

Wong, G., Greenhalgh, T., Westhorp, G., Buckingham, J., & Pawson, R. (2013). RAMESES publication standards: realist syntheses. *BMC Medicine*, 11, 21. <https://doi.org/10.1186/1741-7015-11-21>

Zwarenstein, M., Treweek, S., Gagnier, J. J., Altman, D. G., Tunis, S., Haynes, B., Oxman, A. D., Moher, D., group, C., & Pragmatic Trials in Healthcare, g. (2008). Improving the reporting of pragmatic trials: an extension of the CONSORT statement. *BMJ British Medical Journal*, 337, a2390. <https://doi.org/10.1136/bmj.a2390>
