# Supplementary material
Source: publisher figshare collection journal article supplement (https://asha.figshare.com/articles/dataset/_/25014017)
Supplement: Supplementary file 2 [file 1]

**Supplemental Material S1.** Citations for EQUATOR Network Guidelines that overlap with topics from the Universally Applicable Questions domain of the FRONTIERS Framework.

| <b><u>Universally Applicable</u></b>                       | <b><u>Citations for or overlapping EQUATOR Network</u></b>                                                                                                                                                                                                                                                                                                                                                                                                                                                                                                                                                                                                                                                                        |
|------------------------------------------------------------|-----------------------------------------------------------------------------------------------------------------------------------------------------------------------------------------------------------------------------------------------------------------------------------------------------------------------------------------------------------------------------------------------------------------------------------------------------------------------------------------------------------------------------------------------------------------------------------------------------------------------------------------------------------------------------------------------------------------------------------|
| <b><u>Questions topics</u></b>                             | <b><u>Guidelines</u></b>                                                                                                                                                                                                                                                                                                                                                                                                                                                                                                                                                                                                                                                                                                          |
| <b><u>Details of Data Collection/Testing Protocol:</u></b> |                                                                                                                                                                                                                                                                                                                                                                                                                                                                                                                                                                                                                                                                                                                                   |
| Participant Positioning                                    | Calvert et al., 2018; Heus et al., 2020; Lang et al., 2012; Liu et al., 2020; Portell et al., 2015; Slade et al., 2016; van Heuvelen et al., 2021; Walker et al., 2017                                                                                                                                                                                                                                                                                                                                                                                                                                                                                                                                                            |
| Testing Environment                                        | Agha, Franchi, et al., 2020; Agha, Sohrabi, et al., 2020; Benchimol et al., 2015; Borek et al., 2015; Bossuyt et al., 2015; Calvert et al., 2018; Cambon et al., 2013; Collins et al., 2015; Currow et al., 2012; Dwan et al., 2019; Hoffmann et al., 2014; Hou et al., 2013; Howick et al., 2020; Kahn et al., 2015; Kwakkenbos et al., 2021; Lachat et al., 2016; Liu et al., 2020; Madurasinghe et al., 2016; Mohler et al., 2015; Nagendrababu et al., 2020; Ogrinc et al., 2016; Phillips et al., 2016; Portell et al., 2015; Rhon et al., 2022; Ros et al., 2020; Slade et al., 2016; Tate et al., 2016; Tomaszewski et al., 2017; van Heuvelen et al., 2021; Vohra et al., 2015; von Elm et al., 2007; Walker et al., 2017 |
| <b><u>Rating:</u></b>                                      |                                                                                                                                                                                                                                                                                                                                                                                                                                                                                                                                                                                                                                                                                                                                   |

|                       |                                                                                                                                                                                                                                                                                                                                                                                                                                                                                                                                                                                                                                          |
|-----------------------|------------------------------------------------------------------------------------------------------------------------------------------------------------------------------------------------------------------------------------------------------------------------------------------------------------------------------------------------------------------------------------------------------------------------------------------------------------------------------------------------------------------------------------------------------------------------------------------------------------------------------------------|
| Rater Characteristics | Calvert et al., 2018; Hoffmann et al., 2014; Kottner et al., 2011; Mohler et al., 2015; Pandis et al., 2017; Schulz et al., 2010; Walker et al., 2017                                                                                                                                                                                                                                                                                                                                                                                                                                                                                    |
| Rater Training        | Agha, Franchi, et al., 2020; Borek et al., 2015; Calvert et al., 2018; Cambon et al., 2013; Davidson et al., 2003; Eysenbach & Group, 2011; Hoffmann et al., 2014; Liao et al., 2016; Page et al., 2017; Phillips et al., 2016; Rhon et al., 2022; Streiner & Kottner, 2014; Tomaszewski et al., 2017; Walker et al., 2017                                                                                                                                                                                                                                                                                                               |
| Blinding              | Boutron et al., 2017; Calvert et al., 2018; Campbell et al., 2012; Chan et al., 2013; Des Jarlais et al., 2004; Dimairo et al., 2020; Dwan et al., 2019; Eldridge et al., 2016; Hamilton et al., 2016; Hemming et al., 2018; Hopewell et al., 2008; Howick et al., 2020; Juszczak et al., 2019; Kwakkenbos et al., 2021; Launay et al., 2016; Liu et al., 2020; Madurasinghe et al., 2016; Mistry et al., 2017; Pandis et al., 2017; Porcino et al., 2020; Portell et al., 2015; Rivera et al., 2020; Ros et al., 2020; Saint-Raymond et al., 2010; Schulz et al., 2010; Tate et al., 2016; Welch et al., 2017; Zwarenstein et al., 2008 |
| Reliability           | Borek et al., 2015; Bossuyt et al., 2015; Calvert et al., 2018; Cheng et al., 2016; Cook et al., 2015; Dwan et al., 2019; Eiber et al., 2021; Gagnier et al., 2021; Hou et al.,                                                                                                                                                                                                                                                                                                                                                                                                                                                          |

|                             |                                                                                                                                                                                                                                                                                                                                                                                                                                                                                                                                                                                                                                                                                                                                                                                                                                                            |
|-----------------------------|------------------------------------------------------------------------------------------------------------------------------------------------------------------------------------------------------------------------------------------------------------------------------------------------------------------------------------------------------------------------------------------------------------------------------------------------------------------------------------------------------------------------------------------------------------------------------------------------------------------------------------------------------------------------------------------------------------------------------------------------------------------------------------------------------------------------------------------------------------|
|                             | 2013; Juszczak et al., 2019; Kahn et al., 2015; Kottner et al., 2011; Kwakkenbos et al., 2021; Lachat et al., 2016; Nagendrababu et al., 2020; Portell et al., 2015; Ros et al., 2020; Slade et al., 2016; Streiner & Kottner, 2014; Tate et al., 2016; Virues-Ortega & Moreno-Rodriguez, 2008; Walker et al., 2017                                                                                                                                                                                                                                                                                                                                                                                                                                                                                                                                        |
| <u>Statistical Methods:</u> |                                                                                                                                                                                                                                                                                                                                                                                                                                                                                                                                                                                                                                                                                                                                                                                                                                                            |
| Study Design Considerations | Davidson et al., 2003; Phillips et al., 2016; Rhon et al., 2022; Walker et al., 2017                                                                                                                                                                                                                                                                                                                                                                                                                                                                                                                                                                                                                                                                                                                                                                       |
| Statistical Analyses        | Baldwin & Larson, 2017; Benchimol et al., 2015; Berger et al., 2008; Bilbro et al., 2021; Bossuyt et al., 2015; Breuer et al., 2016; Brookhart et al., 2010; Calvert et al., 2013; Calvert et al., 2018; Campbell et al., 2012; Chan et al., 2013; Cheng et al., 2016; Cohen et al., 2017; Cole, 2015a, 2015b; Collins et al., 2015; Cook et al., 2015; Crawford et al., 2010; Currow et al., 2012; de Jager et al., 2011; Des Jarlais et al., 2004; Dimairo et al., 2020; Dwan et al., 2019; Eiber et al., 2021; Eldridge et al., 2016; Eysenbach, 2004; Gagnier et al., 2021; Gamble et al., 2017; Hagen et al., 2010; Hamilton et al., 2016; Hemming et al., 2018; Heus et al., 2020; Higginson et al., 2013; Homer et al., 2022; Hopewell et al., 2008; Hou et al., 2013; Juszczak et al., 2019; Kahn et al., 2015; Kelley et al., 2003; Kempen, 2011; |

|                                                            |                                                                                                                                                                                                                                                                                                                                                                                                                                                                                                                                                                                                                                                                                                                                                                                                                                                                                                                                                                                                                        |
|------------------------------------------------------------|------------------------------------------------------------------------------------------------------------------------------------------------------------------------------------------------------------------------------------------------------------------------------------------------------------------------------------------------------------------------------------------------------------------------------------------------------------------------------------------------------------------------------------------------------------------------------------------------------------------------------------------------------------------------------------------------------------------------------------------------------------------------------------------------------------------------------------------------------------------------------------------------------------------------------------------------------------------------------------------------------------------------|
|                                                            | <p>Kent et al., 2010; Kerr et al., 2015; Kirkham et al., 2019; Kottner et al., 2011; Kwakkenbos et al., 2021; Launay et al., 2016; Lee et al., 2021; Leech &amp; J., 2010; Liu et al., 2020; Madurasinghe et al., 2016; Mallinson et al., 2022; Manta et al., 2021; Mathew et al., 2021; Mistry et al., 2017; Nagendrababu et al., 2020; Nichols et al., 2017; Noel-Storr et al., 2014; Ogrinc et al., 2016; Pandis et al., 2017; Piaggio et al., 2012; Pinnock et al., 2017; Poldrack et al., 2008; Porcino et al., 2020; Portell et al., 2015; Riley et al., 2010; Rivera et al., 2020; Rodgers et al., 2016; Ros et al., 2020; Schulz et al., 2010; Sharp et al., 2014; Simel et al., 2008; Staniszevska et al., 2017; Staquet et al., 1996; Sterne et al., 2009; Streiner &amp; Kottner, 2014; Sung et al., 2005; Tate et al., 2016; Vasey et al., 2022; Vijayakumar et al., 2018; Virues-Ortega &amp; Moreno-Rodriguez, 2008; Vohra et al., 2015; von Elm et al., 2007; Wang et al., 2007; Welch et al., 2017</p> |
| <p>Data Completeness/<br/>Handling of Missing<br/>Data</p> | <p>Bossuyt et al., 2015; Calvert et al., 2018; Campbell et al., 2012 2012; Gamble et al., 2017; Hagen et al., 2010; Hamilton et al., 2016; Juszczak et al., 2019; Kwakkenbos et al., 2021; Liao et al., 2016; Liu et al., 2020; Mathew et al., 2021; Pandis et al., 2017; Slade et al., 2016; Walker et al., 2017</p>                                                                                                                                                                                                                                                                                                                                                                                                                                                                                                                                                                                                                                                                                                  |

## References:

- Agha, R. A., Franchi, T., Sohrabi, C., Mathew, G., Kerwan, A., & Group, S. (2020). The SCARE 2020 Guideline: Updating Consensus Surgical CAse REport (SCARE) Guidelines. *International Journal of Surgery*, 84, 226-230.  
<https://doi.org/10.1016/j.ijisu.2020.10.034>
- Agha, R. A., Sohrabi, C., Mathew, G., Franchi, T., Kerwan, A., O'Neill, N., & Group, P. (2020). The PROCESS 2020 Guideline: Updating Consensus Preferred Reporting Of CasESeries in Surgery (PROCESS) Guidelines. *International Journal of Surgery*, 84, 231-235. <https://doi.org/10.1016/j.ijisu.2020.11.005>
- Baldwin, S. A., & Larson, M. J. (2017). An introduction to using Bayesian linear regression with clinical data. *Behaviour Research and Therapy*, 98, 58-75.  
<https://doi.org/10.1016/j.brat.2016.12.016>
- Benchimol, E. I., Smeeth, L., Guttman, A., Harron, K., Moher, D., Petersen, I., Sorensen, H. T., von Elm, E., Langan, S. M., & Committee, R. W. (2015). The REporting of studies Conducted using Observational Routinely-collected health Data (RECORD) statement. *PLoS Medicine*, 12(10), e1001885.  
<https://doi.org/10.1371/journal.pmed.1001885>
- Berger, A. M., Wielgus, K. K., Young-McCaughan, S., Fischer, P., Farr, L., & Lee, K. A. (2008). Methodological challenges when using actigraphy in research. *Journal of Pain Symptom Management*, 36(2), 191-199.  
<https://doi.org/10.1016/j.jpainsymman.2007.10.008>
- Bilbro, N. A., Hirst, A., Paez, A., Vasey, B., Pufulete, M., Sedrakyan, A., McCulloch, P., & Group, I. C. R. G. W. (2021). The IDEAL Reporting Guidelines: A Delphi

Consensus Statement Stage Specific Recommendations for Reporting the  
Evaluation of Surgical Innovation. *Annals of Surgery*, 273(1), 82-85.

<https://doi.org/10.1097/SLA.00000000000004180>

Borek, A. J., Abraham, C., Smith, J. R., Greaves, C. J., & Tarrant, M. (2015). A checklist  
to improve reporting of group-based behaviour-change interventions. *BMC Public  
Health*, 15, 963. <https://doi.org/10.1186/s12889-015-2300-6>

Bossuyt, P. M., Reitsma, J. B., Bruns, D. E., Gatsonis, C. A., Glasziou, P. P., Irwig, L.,  
Lijmer, J. G., Moher, D., Rennie, D., de Vet, H. C., Kressel, H. Y., Rifai, N.,  
Golub, R. M., Altman, D. G., Hooft, L., Korevaar, D. A., Cohen, J. F., & Group, S.  
(2015). STARD 2015: an updated list of essential items for reporting diagnostic  
accuracy studies. *BMJ British Medical Journal*, 351, h5527.

<https://doi.org/10.1136/bmj.h5527>

Boutron, I., Altman, D. G., Moher, D., Schulz, K. F., Ravaud, P., & Group, C. N. (2017).  
CONSORT Statement for Randomized Trials of Nonpharmacologic Treatments:  
A 2017 Update and a CONSORT Extension for Nonpharmacologic Trial  
Abstracts. *Annals of Internal Medicine*, 167(1), 40-47.

<https://doi.org/10.7326/M17-0046>

Breuer, E., Lee, L., De Silva, M., & Lund, C. (2016). Using theory of change to design  
and evaluate public health interventions: a systematic review. *Implementation  
Science*, 11, 63. <https://doi.org/10.1186/s13012-016-0422-6>

Brookhart, M. A., Rassen, J. A., & Schneeweiss, S. (2010). Instrumental variable  
methods in comparative safety and effectiveness research.

*Pharmacoepidemiology and Drug Safety*, 19(6), 537-554.

<https://doi.org/10.1002/pds.1908>

Calvert, M., Blazeby, J., Altman, D. G., Revicki, D. A., Moher, D., Brundage, M. D., & Group, C. P. (2013). Reporting of patient-reported outcomes in randomized trials: the CONSORT PRO extension. *JAMA Journal of the American Medical Association*, 309(8), 814-822. <https://doi.org/10.1001/jama.2013.879>

Calvert, M., Kyte, D., Mercieca-Bebber, R., Slade, A., Chan, A. W., King, M. T., the, S.-P. R. O. G., Hunn, A., Bottomley, A., Regnault, A., Chan, A. W., Ells, C., O'Connor, D., Revicki, D., Patrick, D., Altman, D., Basch, E., Velikova, G., Price, G., . . . Groves, T. (2018). Guidelines for Inclusion of Patient-Reported Outcomes in Clinical Trial Protocols: The SPIRIT-PRO Extension. *JAMA Journal of the American Medical Association*, 319(5), 483-494.  
<https://doi.org/10.1001/jama.2017.21903>

Cambon, L., Minary, L., Ridde, V., & Alla, F. (2013). A tool to analyze the transferability of health promotion interventions. *BMC Public Health*, 13, 1184.  
<https://doi.org/10.1186/1471-2458-13-1184>

Campbell, M. K., Piaggio, G., Elbourne, D. R., Altman, D. G., & Group, C. (2012). Consort 2010 statement: extension to cluster randomised trials. *BMJ British Medical Journal*, 345, e5661. <https://doi.org/10.1136/bmj.e5661>

Chan, A. W., Tetzlaff, J. M., Altman, D. G., Laupacis, A., Gotzsche, P. C., Krleza-Jeric, K., Hrobjartsson, A., Mann, H., Dickersin, K., Berlin, J. A., Dore, C. J., Parulekar, W. R., Summerskill, W. S., Groves, T., Schulz, K. F., Sox, H. C., Rockhold, F. W., Rennie, D., & Moher, D. (2013). SPIRIT 2013 statement: defining standard

protocol items for clinical trials. *Annals of Internal Medicine*, 158(3), 200-207.

<https://doi.org/10.7326/0003-4819-158-3-201302050-00583>

Cheng, A., Kessler, D., Mackinnon, R., Chang, T. P., Nadkarni, V. M., Hunt, E. A., Duval-Arnould, J., Lin, Y., Cook, D. A., Pusic, M., Hui, J., Moher, D., Egger, M., Auerbach, M., International Network for Simulation-based Pediatric Innovation, R., & Education Reporting Guidelines, I. (2016). Reporting Guidelines for Health Care Simulation Research: Extensions to the CONSORT and STROBE Statements. *Simulation in Healthcare*, 11(4), 238-248.

<https://doi.org/10.1097/SIH.0000000000000150>

Cohen, J. F., Korevaar, D. A., Gatsonis, C. A., Glasziou, P. P., Hooft, L., Moher, D., Reitsma, J. B., de Vet, H. C., Bossuyt, P. M., & Group, S. (2017). STARD for Abstracts: essential items for reporting diagnostic accuracy studies in journal or conference abstracts. *BMJ British Medical Journal*, 358, j3751.

<https://doi.org/10.1136/bmj.j3751>

Cole, T. J. (2015a). Setting number of decimal places for reporting risk ratios: rule of four. *BMJ British Medical Journal*, 350, h1845. <https://doi.org/10.1136/bmj.h1845>

Cole, T. J. (2015b). Too many digits: the presentation of numerical data. *Archives of Disease in Childhood*, 100(7), 608-609. <https://doi.org/10.1136/archdischild-2014-307149>

Collins, G. S., Reitsma, J. B., Altman, D. G., & Moons, K. G. (2015). Transparent reporting of a multivariable prediction model for individual prognosis or diagnosis (TRIPOD): the TRIPOD statement. *BJOG Obstetrics & Gynecology*, 122(3), 434-443. <https://doi.org/10.1111/1471-0528.13244>



Cook, J. A., Hislop, J., Altman, D. G., Fayers, P., Briggs, A. H., Ramsay, C. R., Norrie, J. D., Harvey, I. M., Buckley, B., Fergusson, D., Ford, I., Vale, L. D., & group, D. (2015). Specifying the target difference in the primary outcome for a randomised controlled trial: guidance for researchers. *Trials*, 16, 12.  
<https://doi.org/10.1186/s13063-014-0526-8>

Crawford, J. R., Garthwaite, P. H., & Porter, S. (2010). Point and interval estimates of effect sizes for the case-controls design in neuropsychology: rationale, methods, implementations, and proposed reporting standards. *Cognitive Neuropsychology*, 27(3), 245-260. <https://doi.org/10.1080/02643294.2010.513967>

Currow, D. C., Tieman, J. J., Greene, A., Zafar, S. Y., Wheeler, J. L., & Abernethy, A. P. (2012). Refining a checklist for reporting patient populations and service characteristics in hospice and palliative care research. *Journal of Pain Symptom Management*, 43(5), 902-910.  
<https://doi.org/10.1016/j.jpainsymman.2011.05.015>

Davidson, K. W., Goldstein, M., Kaplan, R. M., Kaufmann, P. G., Knatterud, G. L., Orleans, C. T., Spring, B., Trudeau, K. J., & Whitlock, E. P. (2003). Evidence-based behavioral medicine: what is it and how do we achieve it? *Annals of Behavioral Medicine*, 26(3), 161-171.  
[https://doi.org/10.1207/S15324796ABM2603\\_01](https://doi.org/10.1207/S15324796ABM2603_01)

de Jager, D. J., de Mutsert, R., Jager, K. J., Zoccali, C., & Dekker, F. W. (2011). Reporting of interaction. *Nephron Clinical Practice*, 119(2), c158-161.  
<https://doi.org/10.1159/000327598>

- Des Jarlais, D. C., Lyles, C., Crepaz, N., & Group, T. (2004). Improving the reporting quality of nonrandomized evaluations of behavioral and public health interventions: the TREND statement. *American Journal of Public Health, 94*(3), 361-366. <https://doi.org/10.2105/ajph.94.3.361>
- Dimairo, M., Pallmann, P., Wason, J., Todd, S., Jaki, T., Julious, S. A., Mander, A. P., Weir, C. J., Koenig, F., Walton, M. K., Nicholl, J. P., Coates, E., Biggs, K., Hamasaki, T., Proschan, M. A., Scott, J. A., Ando, Y., Hind, D., Altman, D. G., & Group, A. C. E. C. (2020). The Adaptive designs CONSORT Extension (ACE) statement: a checklist with explanation and elaboration guideline for reporting randomised trials that use an adaptive design. *BMJ British Medical Journal, 369*, m115. <https://doi.org/10.1136/bmj.m115>
- Dwan, K., Li, T., Altman, D. G., & Elbourne, D. (2019). CONSORT 2010 statement: extension to randomised crossover trials. *BMJ British Medical Journal, 366*, l4378. <https://doi.org/10.1136/bmj.l4378>
- Eiber, C. D., Delbeke, J., Cardoso, J., de Neeling, M., John, S. E., Won Lee, C., Skefos, J., Sun, A., Prodanov, D., & McKinney, Z. (2021). Preliminary Minimum Reporting Requirements for In-Vivo Neural Interface Research: I. Implantable Neural Interfaces. *IEEE Open Journal Engineering in Medicine & Biology, 2*, 74-83. <https://doi.org/10.1109/ojemb.2021.3060919>
- Eldridge, S. M., Chan, C. L., Campbell, M. J., Bond, C. M., Hopewell, S., Thabane, L., Lancaster, G. A., & group, P. c. (2016). CONSORT 2010 statement: extension to randomised pilot and feasibility trials. *Pilot Feasibility Studies, 2*, 64. <https://doi.org/10.1186/s40814-016-0105-8>

- Eysenbach, G. (2004). Improving the quality of Web surveys: the Checklist for Reporting Results of Internet E-Surveys (CHERRIES). *Journal of Medical Internet Research*, 6(3), e34. <https://doi.org/10.2196/jmir.6.3.e34>
- Eysenbach, G., & Group, C.-E. (2011). CONSORT-EHEALTH: improving and standardizing evaluation reports of Web-based and mobile health interventions. *Journal of Medical Internet Research*, 13(4), e126. <https://doi.org/10.2196/jmir.1923>
- Gagnier, J. J., Lai, J., Mokkink, L. B., & Terwee, C. B. (2021). COSMIN reporting guideline for studies on measurement properties of patient-reported outcome measures. *Quality of Life Research*, 30(8), 2197-2218. <https://doi.org/10.1007/s11136-021-02822-4>
- Gamble, C., Krishan, A., Stocken, D., Lewis, S., Juszczak, E., Dore, C., Williamson, P. R., Altman, D. G., Montgomery, A., Lim, P., Berlin, J., Senn, S., Day, S., Barbachano, Y., & Loder, E. (2017). Guidelines for the Content of Statistical Analysis Plans in Clinical Trials. *JAMA Journal of the American Medical Association*, 318(23), 2337-2343. <https://doi.org/10.1001/jama.2017.18556>
- Hagen, N. A., Wu, J. S., & Stiles, C. R. (2010). A proposed taxonomy of terms to guide the clinical trial recruitment process. *Journal of Pain Symptom Management*, 40(1), 102-110. <https://doi.org/10.1016/j.jpainsymman.2009.11.324>
- Hamilton, S., Bernstein, A. B., Blakey, G., Fagan, V., Farrow, T., Jordan, D., Seiler, W., Shannon, A., Gertel, A., & Budapest Working, G. (2016). Developing the Clarity and Openness in Reporting: E3-based (CORE) Reference user manual for

- creation of clinical study reports in the era of clinical trial transparency. *Research Integrity and Peer Review*, 1, 4. <https://doi.org/10.1186/s41073-016-0009-4>
- Hemming, K., Taljaard, M., McKenzie, J. E., Hooper, R., Copas, A., Thompson, J. A., Dixon-Woods, M., Aldcroft, A., Doussau, A., Grayling, M., Kristunas, C., Goldstein, C. E., Campbell, M. K., Girling, A., Eldridge, S., Campbell, M. J., Lilford, R. J., Weijer, C., Forbes, A. B., & Grimshaw, J. M. (2018). Reporting of stepped wedge cluster randomised trials: extension of the CONSORT 2010 statement with explanation and elaboration. *BMJ British Medical Journal*, 363, k1614. <https://doi.org/10.1136/bmj.k1614>
- Heus, P., Reitsma, J. B., Collins, G. S., Damen, J., Scholten, R., Altman, D. G., Moons, K. G. M., & Hooft, L. (2020). Transparent Reporting of Multivariable Prediction Models in Journal and Conference Abstracts: TRIPOD for Abstracts. *Annals of Internal Medicine*. <https://doi.org/10.7326/M20-0193>
- Higginson, I. J., Evans, C. J., Grande, G., Preston, N., Morgan, M., McCrone, P., Lewis, P., Fayers, P., Harding, R., Hotopf, M., Murray, S. A., Benalia, H., Gysels, M., Farquhar, M., Todd, C., & Morecare. (2013). Evaluating complex interventions in end of life care: the MORECare statement on good practice generated by a synthesis of transparent expert consultations and systematic reviews. *BMC Medicine*, 11, 111. <https://doi.org/10.1186/1741-7015-11-111>
- Hoffmann, T. C., Glasziou, P. P., Boutron, I., Milne, R., Perera, R., Moher, D., Altman, D. G., Barbour, V., Macdonald, H., Johnston, M., Lamb, S. E., Dixon-Woods, M., McCulloch, P., Wyatt, J. C., Chan, A. W., & Michie, S. (2014). Better reporting of interventions: template for intervention description and replication (TIDieR)

checklist and guide. *BMJ British Medical Journal*, 348, g1687.

<https://doi.org/10.1136/bmj.g1687>

Homer, V., Yap, C., Bond, S., Holmes, J., Stocken, D., Walker, K., Robinson, E. J., Wheeler, G., Brown, S., Hinsley, S., Schipper, M., Weir, C. J., Rantell, K., Prior, T., Yu, L. M., Kirkpatrick, J., Bedding, A., Gamble, C., & Gaunt, P. (2022). Early phase clinical trials extension to guidelines for the content of statistical analysis plans. *BMJ British Medical Journal*, 376, e068177. <https://doi.org/10.1136/bmj-2021-068177>

Hopewell, S., Clarke, M., Moher, D., Wager, E., Middleton, P., Altman, D. G., Schulz, K. F., & Group, C. (2008). CONSORT for reporting randomised trials in journal and conference abstracts. *Lancet*, 371(9609), 281-283.

[https://doi.org/10.1016/S0140-6736\(07\)61835-2](https://doi.org/10.1016/S0140-6736(07)61835-2)

Hou, Z. K., Liu, F. B., Fang, J. Q., Li, X. Y., Li, L. J., & Lin, C. H. (2013). Advising on Preferred Reporting Items for patient-reported outcome instrument development: the PRIPROID. *Chinese Journal of Integrative Medicine*, 19(3), 172-181.

<https://doi.org/10.1007/s11655-012-1104-0>

Howick, J., Webster, R. K., Rees, J. L., Turner, R., Macdonald, H., Price, A., Evers, A. W. M., Bishop, F., Collins, G. S., Bokelmann, K., Hopewell, S., Knottnerus, A., Lamb, S., Madigan, C., Napadow, V., Papanikitas, A. N., & Hoffmann, T. (2020). TIDieR-Placebo: A guide and checklist for reporting placebo and sham controls.

*PLoS Medicine*, 17(9), e1003294. <https://doi.org/10.1371/journal.pmed.1003294>

Juszczak, E., Altman, D. G., Hopewell, S., & Schulz, K. (2019). Reporting of Multi-Arm Parallel-Group Randomized Trials: Extension of the CONSORT 2010 Statement.

*JAMA Journal of the American Medical Association*, 321(16), 1610-1620.

<https://doi.org/10.1001/jama.2019.3087>

Kahn, M. G., Brown, J. S., Chun, A. T., Davidson, B. N., Meeker, D., Ryan, P. B.,

Schilling, L. M., Weiskopf, N. G., Williams, A. E., & Zozus, M. N. (2015).

Transparent reporting of data quality in distributed data networks. *eGEMs The Journal for Electronic Health Data and Methods*, 3(1), 1052.

<https://doi.org/10.13063/2327-9214.1052>

Kelley, K., Clark, B., Brown, V., & Sitzia, J. (2003). Good practice in the conduct and

reporting of survey research. *International Journal of Quality in Health Care*, 15(3), 261-266. <https://doi.org/10.1093/intqhc/mzg031>

Kempen, J. H. (2011). Appropriate use and reporting of uncontrolled case series in the medical literature. *American Journal of Ophthalmology*, 151(1), 7-10 e11.

<https://doi.org/10.1016/j.ajo.2010.08.047>

Kent, D. M., Rothwell, P. M., Ioannidis, J. P., Altman, D. G., & Hayward, R. A. (2010).

Assessing and reporting heterogeneity in treatment effects in clinical trials: a proposal. *Trials*, 11, 85. <https://doi.org/10.1186/1745-6215-11-85>

Kerr, K. F., Meisner, A., Thiessen-Philbrook, H., Coca, S. G., & Parikh, C. R. (2015).

RiGoR: reporting guidelines to address common sources of bias in risk model development. *Biomarker Research*, 3(1), 2. <https://doi.org/10.1186/s40364-014-0027-7>

Kirkham, J. J., Gorst, S., Altman, D. G., Blazeby, J. M., Clarke, M., Tunis, S.,

Williamson, P. R., & Group, C.-S. (2019). Core Outcome Set-STANDARDISED

Protocol Items: the COS-STAP Statement. *Trials*, 20(1), 116.

<https://doi.org/10.1186/s13063-019-3230-x>

Kottner, J., Audige, L., Brorson, S., Donner, A., Gajewski, B. J., Hrobjartsson, A., Roberts, C., Shoukri, M., & Streiner, D. L. (2011). Guidelines for Reporting Reliability and Agreement Studies (GRRAS) were proposed. *Journal of Clinical Epidemiology*, 64(1), 96-106. <https://doi.org/10.1016/j.jclinepi.2010.03.002>

Kwakkenbos, L., Imran, M., McCall, S. J., McCord, K. A., Frobert, O., Hemkens, L. G., Zwarenstein, M., Relton, C., Rice, D. B., Langan, S. M., Benchimol, E. I., Thabane, L., Campbell, M. K., Sampson, M., Erlinge, D., Verkooijen, H. M., Moher, D., Boutron, I., Ravaud, P., . . . Thombbs, B. D. (2021). CONSORT extension for the reporting of randomised controlled trials conducted using cohorts and routinely collected data (CONSORT-ROUTINE): checklist with explanation and elaboration. *BMJ British Medical Journal*, 373, n857. <https://doi.org/10.1136/bmj.n857>

Lachat, C., Hawwash, D., Ocke, M. C., Berg, C., Forsum, E., Hornell, A., Larsson, C. L., Sonestedt, E., Wirfalt, E., Akesson, A., Kolsteren, P., Byrnes, G., De Keyzer, W., Van Camp, J., Cade, J. E., Slimani, N., Cevallos, M., Egger, M., & Huybrechts, I. (2016). Strengthening the Reporting of Observational Studies in Epidemiology - nutritional epidemiology (STROBE-nut): An extension of the STROBE statement. *Nutrition Bulletin*, 41(3), 240-251. <https://doi.org/10.1111/nbu.12217>

Lang, T. A., Talerico, C., & Siontis, G. C. M. (2012). Documenting clinical and laboratory images in publications: the CLIP principles. *Chest*, 141(6), 1626-1632. <https://doi.org/10.1378/chest.11-1800>

- Launay, E., Cohen, J. F., Bossuyt, P. M., Buekens, P., Deeks, J., Dye, T., Feltbower, R., Ferrari, A., Kramer, M., Leeflang, M., Moher, D., Moons, K. G., von Elm, E., Ravaud, P., & Chalumeau, M. (2016). Reporting studies on time to diagnosis: proposal of a guideline by an international panel (REST). *BMC Medicine*, 14(1), 146. <https://doi.org/10.1186/s12916-016-0690-7>
- Lee, H., Cashin, A. G., Lamb, S. E., Hopewell, S., Vansteelandt, S., VanderWeele, T. J., MacKinnon, D. P., Mansell, G., Collins, G. S., Golub, R. M., McAuley, J. H., group, A. G., Localio, A. R., van Amelsvoort, L., Guallar, E., Rijnhart, J., Goldsmith, K., Fairchild, A. J., Lewis, C. C., . . . Henschke, N. (2021). A Guideline for Reporting Mediation Analyses of Randomized Trials and Observational Studies: The AGReMA Statement. *JAMA Journal of the American Medical Association*, 326(11), 1045-1056. <https://doi.org/10.1001/jama.2021.14075>
- Leech, N. L., & J., O. A. (2010). Guidelines for conducting and reporting mixed research in the field of counseling and beyond. *Journal of Counseling and Development*, 88(1), 61-69.
- Liao, Y., Skelton, K., Dunton, G., & Bruening, M. (2016). A Systematic Review of Methods and Procedures Used in Ecological Momentary Assessments of Diet and Physical Activity Research in Youth: An Adapted STROBE Checklist for Reporting EMA Studies (CREMAS). *Journal of Medical Internet Research*, 18(6), e151. <https://doi.org/10.2196/jmir.4954>
- Liu, X., Rivera, S. C., Moher, D., Calvert, M. J., Denniston, A. K., Spirit, A. I., & Group, C.-A. W. (2020). Reporting guidelines for clinical trial reports for interventions



- involving artificial intelligence: the CONSORT-AI Extension. *BMJ British Medical Journal*, 370, m3164. <https://doi.org/10.1136/bmj.m3164>
- Madurasinghe, V. W., Sandra Eldridge on behalf of, M. R. C. S. G., & Gordon Forbes on behalf of the, S. E. C. G. (2016). Guidelines for reporting embedded recruitment trials. *Trials*, 17, 27. <https://doi.org/10.1186/s13063-015-1126-y>
- Mallinson, T., Kozlowski, A. J., Johnston, M. V., Weaver, J., Terhorst, L., Grampurohit, N., Juengst, S., Ehrlich-Jones, L., Heinemann, A. W., Melvin, J., Sood, P., & Van de Winckel, A. (2022). Rasch Reporting Guideline for Rehabilitation Research (RULER): the RULER Statement. *Archives of Physical Medicine and Rehabilitation*, 103(7), 1477-1486. <https://doi.org/10.1016/j.apmr.2022.03.013>
- Manta, C., Mahadevan, N., Bakker, J., Ozen Irmak, S., Izmailova, E., Park, S., Poon, J. L., Shevade, S., Valentine, S., Vandendriessche, B., Webster, C., & Goldsack, J. C. (2021). EVIDENCE Publication Checklist for Studies Evaluating Connected Sensor Technologies: Explanation and Elaboration. *Digital Biomarkers*, 5(2), 127-147. <https://doi.org/10.1159/000515835>
- Mathew, G., Agha, R., Albrecht, J., Goel, P., Mukherjee, I., Pai, P., D'Cruz, A. K., Nixon, I. J., Roberto, K., Enam, S. A., Basu, S., Muensterer, O. J., Giordano, S., Pagano, D., Machado-Aranda, D., Bradley, P. J., Bashashati, M., Thoma, A., Afifi, R. Y., . . . Group, S. (2021). STROCSS 2021: Strengthening the reporting of cohort, cross-sectional and case-control studies in surgery. *International Journal of Surgery*, 96, 106165. <https://doi.org/10.1016/j.ijsu.2021.106165>
- Mistry, P., Dunn, J. A., & Marshall, A. (2017). A literature review of applied adaptive design methodology within the field of oncology in randomised controlled trials

- and a proposed extension to the CONSORT guidelines. *BMC Medical Research Methodology*, 17(1), 108. <https://doi.org/10.1186/s12874-017-0393-6>
- Mohler, R., Kopke, S., & Meyer, G. (2015). Criteria for Reporting the Development and Evaluation of Complex Interventions in healthcare: revised guideline (CReDECI 2). *Trials*, 16, 204. <https://doi.org/10.1186/s13063-015-0709-y>
- Nagendrababu, V., Duncan, H. F., Bjorndal, L., Kvist, T., Priya, E., Jayaraman, J., Pulikkotil, S. J., Pigg, M., Rechenberg, D. K., Vaeth, M., & Dummer, P. M. H. (2020). PRIRATE 2020 guidelines for reporting randomized trials in Endodontics: a consensus-based development. *International Endodontics Journal*, 53(6), 764-773. <https://doi.org/10.1111/iej.13294>
- Nichols, T. E., Das, S., Eickhoff, S. B., Evans, A. C., Glatard, T., Hanke, M., Kriegeskorte, N., Milham, M. P., Poldrack, R. A., Poline, J. B., Proal, E., Thirion, B., Van Essen, D. C., White, T., & Yeo, B. T. (2017). Best practices in data analysis and sharing in neuroimaging using MRI. *Nature Neuroscience*, 20(3), 299-303. <https://doi.org/10.1038/nn.4500>
- Noel-Storr, A. H., McCleery, J. M., Richard, E., Ritchie, C. W., Flicker, L., Cullum, S. J., Davis, D., Quinn, T. J., Hyde, C., Rutjes, A. W., Smailagic, N., Marcus, S., Black, S., Blennow, K., Brayne, C., Fiorivanti, M., Johnson, J. K., Kopke, S., Schneider, L. S., . . . McShane, R. (2014). Reporting standards for studies of diagnostic test accuracy in dementia: The STARDdem Initiative. *Neurology*, 83(4), 364-373. <https://doi.org/10.1212/WNL.0000000000000621>
- Ogrinc, G., Davies, L., Goodman, D., Batalden, P., Davidoff, F., & Stevens, D. (2016). SQUIRE 2.0 (Standards for QUality Improvement Reporting Excellence): revised

publication guidelines from a detailed consensus process. *BMJ British Medical Journal of Quality and Safety*, 25(12), 986-992. <https://doi.org/10.1136/bmjqs-2015-004411>

Page, P., Hoogenboom, B., & Voight, M. (2017). Improving the Reporting of Therapeutic Exercise Interventions in Rehabilitation Research. *International Journal of Sports & Physical Therapy*, 12(2), 297-304.  
<https://www.ncbi.nlm.nih.gov/pubmed/28515984>

Pandis, N., Chung, B., Scherer, R. W., Elbourne, D., & Altman, D. G. (2017). CONSORT 2010 statement: extension checklist for reporting within person randomised trials. *BMJ British Medical Journal*, 357, j2835.  
<https://doi.org/10.1136/bmj.j2835>

Phillips, A. C., Lewis, L. K., McEvoy, M. P., Galipeau, J., Glasziou, P., Moher, D., Tilson, J. K., & Williams, M. T. (2016). Development and validation of the guideline for reporting evidence-based practice educational interventions and teaching (GREET). *BMC Medical Education*, 16(1), 237. <https://doi.org/10.1186/s12909-016-0759-1>

Piaggio, G., Elbourne, D. R., Pocock, S. J., Evans, S. J., Altman, D. G., & Group, C. (2012). Reporting of noninferiority and equivalence randomized trials: extension of the CONSORT 2010 statement. *JAMA Journal of the American Medical Association*, 308(24), 2594-2604. <https://doi.org/10.1001/jama.2012.87802>

Pinnock, H., Barwick, M., Carpenter, C. R., Eldridge, S., Grandes, G., Griffiths, C. J., Rycroft-Malone, J., Meissner, P., Murray, E., Patel, A., Sheikh, A., Taylor, S. J., & Sta, R. I. G. (2017). Standards for Reporting Implementation Studies (StaRI)

Statement. *BMJ British Medical Journal*, 356, i6795.

<https://doi.org/10.1136/bmj.i6795>

Poldrack, R. A., Fletcher, P. C., Henson, R. N., Worsley, K. J., Brett, M., & Nichols, T. E.

(2008). Guidelines for reporting an fMRI study. *Neuroimage*, 40(2), 409-414.

<https://doi.org/10.1016/j.neuroimage.2007.11.048>

Porcino, A. J., Shamseer, L., Chan, A. W., Kravitz, R. L., Orkin, A., Punja, S., Ravaud, P., Schmid, C. H., Vohra, S., & group, S. (2020). SPIRIT extension and elaboration for n-of-1 trials: SPENT 2019 checklist. *BMJ British Medical Journal*, 368, m122. <https://doi.org/10.1136/bmj.m122>

Portell, M., Anguera, M. T., Chacon-Moscoso, S., & Sanduvete-Chaves, S. (2015).

Guidelines for reporting evaluations based on observational methodology.

*Psicothema*, 27(3), 283-289. <https://doi.org/10.7334/psicothema2014.276>

Rhon, D. I., Fritz, J. M., Kerns, R. D., McGeary, D. D., Coleman, B. C., Farrokhi, S.,

Burgess, D. J., Goertz, C. M., Taylor, S. L., & Hoffmann, T. (2022). TIDieR-

telehealth: precision in reporting of telehealth interventions used in clinical trials -

unique considerations for the Template for the Intervention Description and

Replication (TIDieR) checklist. *BMC Medical Research Methodology*, 22(1), 161.

<https://doi.org/10.1186/s12874-022-01640-7>

Riley, R. D., Lambert, P. C., & Abo-Zaid, G. (2010). Meta-analysis of individual

participant data: rationale, conduct, and reporting. *BMJ British Medical Journal*,

340, c221. <https://doi.org/10.1136/bmj.c221>

Rivera, S. C., Liu, X., Chan, A. W., Denniston, A. K., Calvert, M. J., Spirit, A. I., & Group,

C.-A. W. (2020). Guidelines for clinical trial protocols for interventions involving

- artificial intelligence: the SPIRIT-AI Extension. *BMJ British Medical Journal*, 370, m3210. <https://doi.org/10.1136/bmj.m3210>
- Rodgers, M., Thomas, S., Harden, M., Parker, G., Street, A., & Eastwood, A. (2016). In *Developing a methodological framework for organisational case studies: a rapid review and consensus development process*. <https://doi.org/10.3310/hsdr04010>
- Ros, T., Enriquez-Geppert, S., Zotev, V., Young, K. D., Wood, G., Whitfield-Gabrieli, S., Wan, F., Vuilleumier, P., Vialatte, F., Van De Ville, D., Todder, D., Surmeli, T., Sulzer, J. S., Strehl, U., Sterman, M. B., Steiner, N. J., Sorger, B., Soekadar, S. R., Sitaram, R., . . . Thibault, R. T. (2020). Consensus on the reporting and experimental design of clinical and cognitive-behavioural neurofeedback studies (CRED-nf checklist). *Brain*, 143(6), 1674-1685.  
<https://doi.org/10.1093/brain/awaa009>
- Saint-Raymond, A., Hill, S., Martines, J., Bahl, R., Fontaine, O., & Bero, L. (2010). Consort 2010. *Lancet*, 376(9737), 229-230. [https://doi.org/10.1016/S0140-6736\(10\)61134-8](https://doi.org/10.1016/S0140-6736(10)61134-8)
- Schulz, K. F., Altman, D. G., & Moher, D. (2010). CONSORT 2010 statement: Updated guidelines for reporting parallel group randomised trials. *Journal of Pharmacology and Pharmacotherapy*, 1(2), 100-107.  
<https://doi.org/10.4103/0976-500X.72352>
- Sharp, S. J., Poulaliou, M., Thompson, S. G., White, I. R., & Wood, A. M. (2014). A review of published analyses of case-cohort studies and recommendations for future reporting. *PLoS One*, 9(6), e101176.  
<https://doi.org/10.1371/journal.pone.0101176>

- Simel, D. L., Rennie, D., & Bossuyt, P. M. (2008). The STARD statement for reporting diagnostic accuracy studies: application to the history and physical examination. *Journal of General Internal Medicine*, 23(6), 768-774.  
<https://doi.org/10.1007/s11606-008-0583-3>
- Slade, S. C., Dionne, C. E., Underwood, M., Buchbinder, R., Beck, B., Bennell, K., Brosseau, L., Costa, L., Cramp, F., Cup, E., Feehan, L., Ferreira, M., Forbes, S., Glasziou, P., Habets, B., Harris, S., Hay-Smith, J., Hillier, S., Hinman, R., . . . White, C. (2016). Consensus on Exercise Reporting Template (CERT): Modified Delphi Study. *Physical Therapy*, 96(10), 1514-1524.  
<https://doi.org/10.2522/ptj.20150668>
- Staniszewska, S., Brett, J., Simera, I., Seers, K., Mockford, C., Goodlad, S., Altman, D. G., Moher, D., Barber, R., Denegri, S., Entwistle, A., Littlejohns, P., Morris, C., Suleman, R., Thomas, V., & Tysall, C. (2017). GRIPP2 reporting checklists: tools to improve reporting of patient and public involvement in research. *Research Involvement & Engagement*, 3, 13. <https://doi.org/10.1186/s40900-017-0062-2>
- Staquet, M., Berzon, R., Osoba, D., & Machin, D. (1996). Guidelines for reporting results of quality of life assessments in clinical trials. *Quality of Life Research*, 5(5), 496-502. <https://doi.org/10.1007/BF00540022>
- Sterne, J. A., White, I. R., Carlin, J. B., Spratt, M., Royston, P., Kenward, M. G., Wood, A. M., & Carpenter, J. R. (2009). Multiple imputation for missing data in epidemiological and clinical research: potential and pitfalls. *BMJ British Medical Journal*, 338, b2393. <https://doi.org/10.1136/bmj.b2393>

- Streiner, D. L., & Kottner, J. (2014). Recommendations for reporting the results of studies of instrument and scale development and testing. *Journal of Advances in Nursing*, 70(9), 1970-1979. <https://doi.org/10.1111/jan.12402>
- Sung, L., Hayden, J., Greenberg, M. L., Koren, G., Feldman, B. M., & Tomlinson, G. A. (2005). Seven items were identified for inclusion when reporting a Bayesian analysis of a clinical study. *Journal of Clinical Epidemiology*, 58(3), 261-268. <https://doi.org/10.1016/j.jclinepi.2004.08.010>
- Tate, R. L., Perdices, M., Rosenkoetter, U., Shadish, W., Vohra, S., Barlow, D. H., Horner, R., Kazdin, A., Kratochwill, T., McDonald, S., Sampson, M., Shamseer, L., Togher, L., Albin, R., Backman, C., Douglas, J., Evans, J. J., Gast, D., Manolov, R., . . . Wilson, B. (2016). The Single-Case Reporting Guideline In BEhavioural Interventions (SCRIBE) 2016 Statement. *Journal of Clinical Epidemiology*, 73, 142-152. <https://doi.org/10.1016/j.jclinepi.2016.04.006>
- Tomaszewski, K. A., Henry, B. M., Kumar Ramakrishnan, P., Roy, J., Vikse, J., Loukas, M., Tubbs, R. S., & Walocha, J. A. (2017). Development of the Anatomical Quality Assurance (AQUA) checklist: Guidelines for reporting original anatomical studies. *Clinical Anatomy*, 30(1), 14-20. <https://doi.org/10.1002/ca.22800>
- van Heuvelen, M. J. G., Rittweger, J., Judex, S., Sanudo, B., Seixas, A., Fuermaier, A. B. M., Tucha, O., Nyakas, C., Marin, P. J., Taiar, R., Stark, C., Schoenau, E., Sa-Caputo, D. C., Bernardo-Filho, M., & van der Zee, E. A. (2021). Reporting Guidelines for Whole-Body Vibration Studies in Humans, Animals and Cell Cultures: A Consensus Statement from an International Group of Experts. *Biology (Basel)*, 10(10). <https://doi.org/10.3390/biology10100965>

- Vasey, B., Nagendran, M., Campbell, B., Clifton, D. A., Collins, G. S., Denaxas, S.,  
Denniston, A. K., Faes, L., Geerts, B., Ibrahim, M., Liu, X., Mateen, B. A., Mathur,  
P., McCradden, M. D., Morgan, L., Ordish, J., Rogers, C., Saria, S., Ting, D. S.  
W., . . . group, D.-A. e. (2022). Reporting guideline for the early-stage clinical  
evaluation of decision support systems driven by artificial intelligence: DECIDE-  
AI. *Nature Medicine*, 28(5), 924-933. <https://doi.org/10.1038/s41591-022-01772-9>
- Vijayakumar, N., Mills, K. L., Alexander-Bloch, A., Tamnes, C. K., & Whittle, S. (2018).  
Structural brain development: A review of methodological approaches and best  
practices. *Developmental Cognitive Neuroscience*, 33, 129-148.  
<https://doi.org/10.1016/j.dcn.2017.11.008>
- Virues-Ortega, J., & Moreno-Rodriguez, R. (2008). Guidelines for clinical case reports in  
behavioral clinical psychology. *International Journal of Clinical Health  
Psychology*, 8(3), 765-777.
- Vohra, S., Shamseer, L., Sampson, M., Bukutu, C., Schmid, C. H., Tate, R., Nikles, J.,  
Zucker, D. R., Kravitz, R., Guyatt, G., Altman, D. G., Moher, D., & Group, C.  
(2015). CONSORT extension for reporting N-of-1 trials (CENT) 2015 Statement.  
*BMJ British Medical Journal*, 350, h1738. <https://doi.org/10.1136/bmj.h1738>
- von Elm, E., Altman, D. G., Egger, M., Pocock, S. J., Gøtzsche, P. C., Vandenbroucke,  
J. P., & Initiative, S. (2007). The Strengthening the Reporting of Observational  
Studies in Epidemiology (STROBE) statement: guidelines for reporting  
observational studies. *Annals of Internal Medicine*, 147(8), 573-577.  
<https://doi.org/10.7326/0003-4819-147-8-200710160-00010>



- Walker, M. F., Hoffmann, T. C., Brady, M. C., Dean, C. M., Eng, J. J., Farrin, A. J., Felix, C., Forster, A., Langhorne, P., Lynch, E. A., Radford, K. A., Sunnerhagen, K. S., & Watkins, C. L. (2017). Improving the Development, Monitoring and Reporting of Stroke Rehabilitation Research: Consensus-Based Core Recommendations from the Stroke Recovery and Rehabilitation Roundtable. *Neurorehabilitation Neural Repair*, 31(10-11), 877-884. <https://doi.org/10.1177/1545968317732686>
- Wang, R., Lagakos, S. W., Ware, J. H., Hunter, D. J., & Drazen, J. M. (2007). Statistics in medicine--reporting of subgroup analyses in clinical trials. *New England Journal of Medicine*, 357(21), 2189-2194. <https://doi.org/10.1056/NEJMSr077003>
- Welch, V. A., Norheim, O. F., Jull, J., Cookson, R., Sommerfelt, H., Tugwell, P., Equity, C., & Boston Equity, S. (2017). CONSORT-Equity 2017 extension and elaboration for better reporting of health equity in randomised trials. *BMJ British Medical Journal*, 359, j5085. <https://doi.org/10.1136/bmj.j5085>
- Zwarenstein, M., Treweek, S., Gagnier, J. J., Altman, D. G., Tunis, S., Haynes, B., Oxman, A. D., Moher, D., group, C., & Pragmatic Trials in Healthcare, g. (2008). Improving the reporting of pragmatic trials: an extension of the CONSORT statement. *BMJ British Medical Journal*, 337, a2390. <https://doi.org/10.1136/bmj.a2390>
